# Supplementary material for: Impact of storage on starch digestibility and texture of a high-amylose wheat bread
Source: bioRxiv or medRxiv preprint supplement (doi:10.1101/2022.07.04.498686), 2022-09-13
Supplement: Supplementary file [file media-1.pdf]

Table 1. Weight of bread rolls before and after baking, and after storage. Moisture measured by air-oven method. Mean  $\pm$  SEM, n=3 independent samples per condition.

| Time (h) | Storage | Genotype     | Moisture (%)     | Dough weight (g)  | Baked roll weight (g) | Roll weight after storage (g) |
|----------|---------|--------------|------------------|-------------------|-----------------------|-------------------------------|
| 0        | Fresh   | <i>sbell</i> | 48.76 $\pm$ 0.12 | 183.06 $\pm$ 0.21 | 161.26 $\pm$ 0.16     | -                             |
| 0        | Fresh   | WT           | 46.50 $\pm$ 0.20 | 173.56 $\pm$ 0.36 | 155.73 $\pm$ 0.40     | -                             |
| 24       | Freezer | <i>sbell</i> | 48.74 $\pm$ 0.13 | 183.13 $\pm$ 0.14 | 160.20 $\pm$ 0.39     | 160.13 $\pm$ 0.41             |
| 24       | Freezer | WT           | 46.55 $\pm$ 0.16 | 173.73 $\pm$ 0.28 | 156.03 $\pm$ 0.49     | 156.03 $\pm$ 0.49             |
| 24       | Fridge  | <i>sbell</i> | 48.81 $\pm$ 0.27 | 183.03 $\pm$ 0.18 | 160.66 $\pm$ 0.31     | 160.63 $\pm$ 0.29             |
| 24       | Fridge  | WT           | 46.37 $\pm$ 0.10 | 173.60 $\pm$ 0.30 | 155.06 $\pm$ 0.66     | 155.06 $\pm$ 0.63             |
| 24       | RT      | <i>sbell</i> | 48.52 $\pm$ 0.10 | 183.13 $\pm$ 0.18 | 161.40 $\pm$ 0.20     | 161.30 $\pm$ 0.29             |
| 24       | RT      | WT           | 46.42 $\pm$ 0.05 | 173.70 $\pm$ 0.20 | 156.06 $\pm$ 0.12     | 155.90 $\pm$ 0.29             |
| 48       | Freezer | <i>sbell</i> | 48.86 $\pm$ 0.08 | 183.20 $\pm$ 0.11 | 161.90 $\pm$ 0.30     | 161.86 $\pm$ 0.21             |
| 48       | Freezer | WT           | 46.54 $\pm$ 0.19 | 173.33 $\pm$ 0.24 | 154.53 $\pm$ 0.23     | 154.53 $\pm$ 0.23             |
| 48       | Fridge  | <i>sbell</i> | 48.68 $\pm$ 0.02 | 183.20 $\pm$ 0.15 | 161.23 $\pm$ 0.64     | 161.23 $\pm$ 0.58             |
| 48       | Fridge  | WT           | 46.17 $\pm$ 0.39 | 173.50 $\pm$ 0.28 | 154.73 $\pm$ 0.46     | 154.73 $\pm$ 0.41             |
| 48       | RT      | <i>sbell</i> | 48.69 $\pm$ 0.01 | 183.16 $\pm$ 0.14 | 161.63 $\pm$ 0.43     | 161.33 $\pm$ 0.48             |
| 48       | RT      | WT           | 45.34 $\pm$ 0.82 | 173.30 $\pm$ 0.20 | 155.26 $\pm$ 0.46     | 155.03 $\pm$ 0.43             |
| 72       | Freezer | <i>sbell</i> | 49.01 $\pm$ 0.00 | 183.03 $\pm$ 0.31 | 160.80 $\pm$ 0.55     | 160.70 $\pm$ 0.55             |
| 72       | Freezer | WT           | 47.49 $\pm$ 1.34 | 174.16 $\pm$ 0.29 | 155.70 $\pm$ 0.70     | 155.70 $\pm$ 0.70             |
| 72       | Fridge  | <i>sbell</i> | 48.76 $\pm$ 0.01 | 183.03 $\pm$ 0.26 | 160.83 $\pm$ 0.48     | 160.83 $\pm$ 0.48             |
| 72       | Fridge  | WT           | 47.58 $\pm$ 1.62 | 174.36 $\pm$ 0.31 | 156.13 $\pm$ 0.64     | 156.10 $\pm$ 0.64             |
| 72       | RT      | <i>sbell</i> | 48.74 $\pm$ 0.04 | 182.96 $\pm$ 0.29 | 161.63 $\pm$ 0.35     | 161.36 $\pm$ 0.32             |
| 72       | RT      | WT           | 46.30 $\pm$ 0.66 | 174.10 $\pm$ 0.47 | 156.10 $\pm$ 0.92     | 155.80 $\pm$ 0.92             |

Table 2. Starch susceptibility to amylolysis in bread. Estimated marginal means with 95% CI,  $n = 3$  independent samples per condition.

| Genotype     | Storage | Time | $C_{90}$ (%)      | AUC (%min <sup>-1</sup> ) | $k$ (min <sup>-1</sup> ) | $C_{\infty}$ (%)     |
|--------------|---------|------|-------------------|---------------------------|--------------------------|----------------------|
| <i>sbell</i> | Fresh   | 0h   | 51.7 [46.6; 56.9] | 3581 [3336; 3826]         | 0.040 [0.028; 0.053]     | 54.2 [37.6; 70.8]    |
|              | RT      | 24h  | 60.3 [55.2; 65.5] | 3482 [3237; 3727]         | 0.021 [0.008; 0.033]     | 69.9 [53.3; 86.5]    |
|              | RT      | 48h  | 53.3 [48.1; 58.4] | 2805 [2560; 3050]         | 0.011 [-0.0004; 0.024]   | 84.1 [67.6; 100.7]   |
|              | RT      | 72h  | 60.4 [55.2; 65.6] | 3060 [2815; 3305]         | 0.009 [-0.003; 0.021]    | 119.4 [102.8; 135.9] |
|              | Freezer | 24h  | 44.9 [39.8; 50.1] | 2636 [2391; 2881]         | 0.019 [0.006; 0.031]     | 56.1 [39.6; 72.7]    |
|              | Freezer | 48h  | 58.6 [53.4; 63.8] | 3486 [3240; 3731]         | 0.020 [0.007; 0.032]     | 73.1 [56.5; 89.7]    |
|              | Freezer | 72h  | 61.4 [56.3; 66.6] | 3746 [3501; 3991]         | 0.025 [0.012; 0.037]     | 69.1 [52.5; 85.6]    |
|              | Fridge  | 24h  | 52.0 [46.8; 57.1] | 3025 [2780; 3271]         | 0.020 [0.008; 0.033]     | 62.0 [45.4; 78.5]    |
|              | Fridge  | 48h  | 55.6 [50.4; 60.7] | 3097 [2852; 3343]         | 0.019 [0.007; 0.032]     | 66.5 [49.9; 83.1]    |
|              | Fridge  | 72h  | 61.7 [56.6; 66.9] | 3429 [3184; 3674]         | 0.018 [0.006; 0.031]     | 73.5 [57.0; 90.1]    |
| WT           | Fresh   | 0h   | 62.4 [57.2; 67.6] | 4682 [4437; 4927]         | 0.083 [0.071; 0.095]     | 60.4 [43.9; 77.0]    |
|              | RT      | 24h  | 71.5 [65.1; 77.9] | 4789 [4544; 5034]         | 0.043 [0.030; 0.055]     | 71.3 [54.7; 87.8]    |
|              | RT      | 48h  | 68.6 [63.5; 73.8] | 3989 [3744; 4234]         | 0.017 [0.004; 0.029]     | 91.6 [75.0; 108.2]   |
|              | RT      | 72h  | 82.1 [76.9; 87.2] | 4727 [4482; 4972]         | 0.015 [0.002; 0.027]     | 122.0 [105.5; 138.6] |
|              | Freezer | 24h  | 64.1 [59.0; 69.3] | 4380 [4134; 4625]         | 0.039 [0.027; 0.052]     | 68.4 [51.8; 84.9]    |
|              | Freezer | 48h  | 75.7 [70.5; 80.8] | 5412 [5167; 5657]         | 0.049 [0.037; 0.062]     | 77.2 [60.7; 93.8]    |
|              | Freezer | 72h  | 78.6 [73.5; 83.8] | 5521 [5276; 5767]         | 0.070 [0.058; 0.083]     | 75.2 [58.7; 91.8]    |
|              | Fridge  | 24h  | 63.0 [57.9; 68.2] | 4359 [4114; 4605]         | 0.043 [0.030; 0.055]     | 64.7 [48.2; 81.3]    |
|              | Fridge  | 48h  | 71.6 [66.4; 76.7] | 4773 [4527; 5018]         | 0.045 [0.033; 0.057]     | 70.6 [54.0; 87.2]    |
|              | Fridge  | 72h  | 78.5 [73.4; 83.7] | 5253 [5008; 5498]         | 0.039 [0.026; 0.051]     | 80.7 [64.1; 97.3]    |

Table 3. Texture analysis measurements, Estimated marginal means with 95% CI, n = 3 independent samples per condition (4 technical replicates)

| Storage Condition | Storage duration | Genotype     | Response | SE     | df | lower.CL | upper.CL | Texture measure |
|-------------------|------------------|--------------|----------|--------|----|----------|----------|-----------------|
| Fresh             | 0h               | WT           | 305.8183 | 26.939 | 40 | 223.961  | 417.5942 | Hardness        |
| Fresh             | 0h               | <i>sbell</i> | 373.4318 | 32.895 | 40 | 273.4767 | 509.9203 | Hardness        |
| Freezer           | 24h              | WT           | 581.705  | 51.241 | 40 | 426.0021 | 794.3169 | Hardness        |
| Freezer           | 24h              | <i>sbell</i> | 642.7244 | 56.616 | 40 | 470.6887 | 877.6388 | Hardness        |
| Fridge            | 24h              | WT           | 1164.528 | 102.58 | 40 | 852.8233 | 1590.161 | Hardness        |
| Fridge            | 24h              | <i>sbell</i> | 936.6819 | 82.51  | 40 | 685.9637 | 1279.037 | Hardness        |
| RT                | 24h              | WT           | 783.4469 | 69.012 | 40 | 573.7445 | 1069.795 | Hardness        |
| RT                | 24h              | <i>sbell</i> | 616.8406 | 54.336 | 40 | 451.7332 | 842.2945 | Hardness        |
| Freezer           | 48h              | WT           | 556.6381 | 48.742 | 39 | 408.1547 | 759.1387 | Hardness        |
| Freezer           | 48h              | <i>sbell</i> | 600.6628 | 52.911 | 40 | 439.8856 | 820.2038 | Hardness        |
| Fridge            | 48h              | WT           | 1207.639 | 106.38 | 40 | 884.3946 | 1649.028 | Hardness        |
| Fridge            | 48h              | <i>sbell</i> | 965.9951 | 85.092 | 40 | 707.4307 | 1319.064 | Hardness        |
| RT                | 48h              | WT           | 992.0864 | 87.391 | 40 | 726.5382 | 1354.692 | Hardness        |
| RT                | 48h              | <i>sbell</i> | 729.762  | 64.283 | 40 | 534.4292 | 996.4884 | Hardness        |
| Freezer           | 72h              | WT           | 736.7416 | 64.898 | 40 | 539.5406 | 1006.019 | Hardness        |
| Freezer           | 72h              | <i>sbell</i> | 679.0834 | 59.819 | 40 | 497.3156 | 927.2869 | Hardness        |
| Fridge            | 72h              | WT           | 1860.303 | 163.87 | 40 | 1362.362 | 2540.239 | Hardness        |
| Fridge            | 72h              | <i>sbell</i> | 1141.099 | 100.52 | 40 | 835.665  | 1558.168 | Hardness        |
| RT                | 72h              | WT           | 1326.348 | 116.84 | 40 | 971.329  | 1811.125 | Hardness        |
| RT                | 72h              | <i>sbell</i> | 878.3376 | 77.371 | 40 | 643.2362 | 1199.368 | Hardness        |
| Fresh             | 0h               | WT           | 0.906002 | 0.0365 | 40 | 0.785811 | 1.044576 | Cohesiveness    |
| Fresh             | 0h               | <i>sbell</i> | 0.859134 | 0.0346 | 40 | 0.74516  | 0.99054  | Cohesiveness    |
| Freezer           | 24h              | WT           | 0.816017 | 0.0329 | 40 | 0.707763 | 0.940828 | Cohesiveness    |
| Freezer           | 24h              | <i>sbell</i> | 0.736312 | 0.0296 | 40 | 0.638632 | 0.848932 | Cohesiveness    |
| Fridge            | 24h              | WT           | 0.697355 | 0.0281 | 40 | 0.604843 | 0.804016 | Cohesiveness    |
| Fridge            | 24h              | <i>sbell</i> | 0.7163   | 0.0288 | 40 | 0.621275 | 0.825859 | Cohesiveness    |
| RT                | 24h              | WT           | 0.779263 | 0.0314 | 40 | 0.675885 | 0.898453 | Cohesiveness    |
| RT                | 24h              | <i>sbell</i> | 0.732887 | 0.0295 | 40 | 0.635662 | 0.844984 | Cohesiveness    |

|         |     |              |          |        |    |          |          |              |
|---------|-----|--------------|----------|--------|----|----------|----------|--------------|
| Freezer | 48h | WT           | 0.82841  | 0.0324 | 35 | 0.720284 | 0.952768 | Cohesiveness |
| Freezer | 48h | <i>sbell</i> | 0.745085 | 0.03   | 40 | 0.646242 | 0.859048 | Cohesiveness |
| Fridge  | 48h | WT           | 0.665942 | 0.0268 | 40 | 0.577598 | 0.7678   | Cohesiveness |
| Fridge  | 48h | <i>sbell</i> | 0.677572 | 0.0273 | 40 | 0.587684 | 0.781208 | Cohesiveness |
| RT      | 48h | WT           | 0.697285 | 0.0281 | 40 | 0.604783 | 0.803937 | Cohesiveness |
| RT      | 48h | <i>sbell</i> | 0.665358 | 0.0268 | 40 | 0.577091 | 0.767126 | Cohesiveness |
| Freezer | 72h | WT           | 0.801086 | 0.0323 | 40 | 0.694813 | 0.923614 | Cohesiveness |
| Freezer | 72h | <i>sbell</i> | 0.734578 | 0.0296 | 40 | 0.637128 | 0.846933 | Cohesiveness |
| Fridge  | 72h | WT           | 0.585278 | 0.0236 | 40 | 0.507635 | 0.674798 | Cohesiveness |
| Fridge  | 72h | <i>sbell</i> | 0.549974 | 0.0221 | 40 | 0.477014 | 0.634093 | Cohesiveness |
| RT      | 72h | WT           | 0.668668 | 0.0269 | 40 | 0.579962 | 0.770942 | Cohesiveness |
| RT      | 72h | <i>sbell</i> | 0.676337 | 0.0272 | 40 | 0.586614 | 0.779784 | Cohesiveness |
| Fresh   | 0h  | WT           | 733.626  | 68.894 | 40 | 526.3783 | 1022.472 | Cohesiveness |
| Fresh   | 0h  | <i>sbell</i> | 515.8861 | 48.447 | 40 | 370.1494 | 719.0027 | Cohesiveness |
| Freezer | 24h | WT           | 543.2563 | 51.017 | 40 | 389.7876 | 757.1492 | Cohesiveness |
| Freezer | 24h | <i>sbell</i> | 468.7169 | 44.017 | 40 | 336.3055 | 653.2619 | Cohesiveness |
| Fridge  | 24h | WT           | 809.168  | 75.988 | 40 | 580.5799 | 1127.757 | Cohesiveness |
| Fridge  | 24h | <i>sbell</i> | 729.0972 | 68.469 | 40 | 523.1289 | 1016.16  | Cohesiveness |
| RT      | 24h | WT           | 609.2306 | 57.212 | 40 | 437.1243 | 849.0992 | Cohesiveness |
| RT      | 24h | <i>sbell</i> | 554.4715 | 52.07  | 40 | 397.8346 | 772.7801 | Cohesiveness |
| Freezer | 48h | WT           | 524.144  | 47.791 | 35 | 378.3489 | 726.1204 | Cohesiveness |
| Freezer | 48h | <i>sbell</i> | 457.1171 | 42.928 | 40 | 327.9825 | 637.0949 | Cohesiveness |
| Fridge  | 48h | WT           | 807.6437 | 75.845 | 40 | 579.4862 | 1125.632 | Cohesiveness |
| Fridge  | 48h | <i>sbell</i> | 681.4935 | 63.999 | 40 | 488.9731 | 949.8137 | Cohesiveness |
| RT      | 48h | WT           | 690.9314 | 64.885 | 40 | 495.7449 | 962.9676 | Cohesiveness |
| RT      | 48h | <i>sbell</i> | 601.9149 | 56.525 | 40 | 431.8753 | 838.9032 | Cohesiveness |
| Freezer | 72h | WT           | 593.2733 | 55.714 | 40 | 425.6749 | 826.8591 | Cohesiveness |
| Freezer | 72h | <i>sbell</i> | 503.3437 | 47.269 | 40 | 361.1502 | 701.5221 | Cohesiveness |
| Fridge  | 72h | WT           | 1088.233 | 102.2  | 40 | 780.8099 | 1516.697 | Cohesiveness |
| Fridge  | 72h | <i>sbell</i> | 634.5509 | 59.59  | 40 | 455.2917 | 884.3887 | Cohesiveness |
| RT      | 72h | WT           | 888.9669 | 83.482 | 40 | 637.8358 | 1238.974 | Cohesiveness |

|         |     |              |          |        |    |          |          |              |
|---------|-----|--------------|----------|--------|----|----------|----------|--------------|
| RT      | 72h | <i>sbell</i> | 593.9452 | 55.777 | 40 | 426.1571 | 827.7956 | Cohesiveness |
| Fresh   | 0h  | WT           | 0.642881 | 0.0144 | 40 | 0.593882 | 0.695922 | Cohesiveness |
| Fresh   | 0h  | <i>sbell</i> | 0.626407 | 0.014  | 40 | 0.578664 | 0.67809  | Cohesiveness |
| Freezer | 24h | WT           | 0.577142 | 0.0129 | 40 | 0.533153 | 0.62476  | Cohesiveness |
| Freezer | 24h | <i>sbell</i> | 0.523458 | 0.0117 | 40 | 0.483561 | 0.566647 | Cohesiveness |
| Fridge  | 24h | WT           | 0.471252 | 0.0106 | 40 | 0.435334 | 0.510133 | Cohesiveness |
| Fridge  | 24h | <i>sbell</i> | 0.519163 | 0.0116 | 40 | 0.479593 | 0.561997 | Cohesiveness |
| RT      | 24h | WT           | 0.544125 | 0.0122 | 40 | 0.502653 | 0.589019 | Cohesiveness |
| RT      | 24h | <i>sbell</i> | 0.552746 | 0.0124 | 40 | 0.510617 | 0.598351 | Cohesiveness |
| Freezer | 48h | WT           | 0.581027 | 0.0129 | 38 | 0.537069 | 0.628583 | Cohesiveness |
| Freezer | 48h | <i>sbell</i> | 0.492143 | 0.011  | 40 | 0.454633 | 0.532747 | Cohesiveness |
| Fridge  | 48h | WT           | 0.435805 | 0.0098 | 40 | 0.402589 | 0.471762 | Cohesiveness |
| Fridge  | 48h | <i>sbell</i> | 0.469281 | 0.0105 | 40 | 0.433513 | 0.507999 | Cohesiveness |
| RT      | 48h | WT           | 0.489392 | 0.011  | 40 | 0.452092 | 0.52977  | Cohesiveness |
| RT      | 48h | <i>sbell</i> | 0.505461 | 0.0113 | 40 | 0.466936 | 0.547165 | Cohesiveness |
| Freezer | 72h | WT           | 0.551776 | 0.0124 | 40 | 0.509721 | 0.597301 | Cohesiveness |
| Freezer | 72h | <i>sbell</i> | 0.481038 | 0.0108 | 40 | 0.444374 | 0.520726 | Cohesiveness |
| Fridge  | 72h | WT           | 0.37733  | 0.0085 | 40 | 0.348571 | 0.408462 | Cohesiveness |
| Fridge  | 72h | <i>sbell</i> | 0.474302 | 0.0106 | 40 | 0.438152 | 0.513435 | Cohesiveness |
| RT      | 72h | WT           | 0.450442 | 0.0101 | 40 | 0.416111 | 0.487607 | Cohesiveness |
| RT      | 72h | <i>sbell</i> | 0.487987 | 0.0109 | 40 | 0.450794 | 0.528249 | Cohesiveness |
| Fresh   | 0h  | WT           | 277.0349 | 26.774 | 40 | 196.8383 | 389.9055 | Chewiness    |
| Fresh   | 0h  | <i>sbell</i> | 320.864  | 31.01  | 40 | 227.9797 | 451.5915 | Chewiness    |
| Freezer | 24h | WT           | 474.6306 | 45.87  | 40 | 337.2337 | 668.0064 | Chewiness    |
| Freezer | 24h | <i>sbell</i> | 473.1832 | 45.73  | 40 | 336.2052 | 665.9692 | Chewiness    |
| Fridge  | 24h | WT           | 812.071  | 78.482 | 40 | 576.9911 | 1142.928 | Chewiness    |
| Fridge  | 24h | <i>sbell</i> | 670.8578 | 64.834 | 40 | 476.6566 | 944.1811 | Chewiness    |
| RT      | 24h | WT           | 610.4644 | 58.998 | 40 | 433.746  | 859.1821 | Chewiness    |
| RT      | 24h | <i>sbell</i> | 452.1936 | 43.702 | 40 | 321.2917 | 636.4279 | Chewiness    |
| Freezer | 48h | WT           | 460.4346 | 44.102 | 39 | 327.8144 | 646.7075 | Chewiness    |
| Freezer | 48h | <i>sbell</i> | 447.477  | 43.246 | 40 | 317.9405 | 629.7897 | Chewiness    |

|         |     |              |          |        |    |          |          |            |
|---------|-----|--------------|----------|--------|----|----------|----------|------------|
| Fridge  | 48h | WT           | 804.2747 | 77.728 | 40 | 571.4518 | 1131.955 | Chewiness  |
| Fridge  | 48h | <i>sbell</i> | 654.5011 | 63.254 | 40 | 465.0349 | 921.1603 | Chewiness  |
| RT      | 48h | WT           | 691.7454 | 66.853 | 40 | 491.4977 | 973.5789 | Chewiness  |
| RT      | 48h | <i>sbell</i> | 485.5551 | 46.926 | 40 | 344.9957 | 683.3818 | Chewiness  |
| Freezer | 72h | WT           | 590.1039 | 57.03  | 40 | 419.2795 | 830.5262 | Chewiness  |
| Freezer | 72h | <i>sbell</i> | 498.8946 | 48.215 | 40 | 354.4737 | 702.1561 | Chewiness  |
| Fridge  | 72h | WT           | 1088.795 | 105.23 | 40 | 773.6088 | 1532.396 | Chewiness  |
| Fridge  | 72h | <i>sbell</i> | 627.5834 | 60.652 | 40 | 445.9094 | 883.2757 | Chewiness  |
| RT      | 72h | WT           | 886.9733 | 85.721 | 40 | 630.2106 | 1248.347 | Chewiness  |
| RT      | 72h | <i>sbell</i> | 594.0192 | 57.408 | 40 | 422.0614 | 836.0366 | Chewiness  |
| Fresh   | 0h  | WT           | 2.90255  | 0.2297 | 42 | 2.195948 | 3.836519 | Resilience |
| Fresh   | 0h  | <i>sbell</i> | 1.397544 | 0.1155 | 50 | 1.048093 | 1.863508 | Resilience |
| Freezer | 24h | WT           | 1.144744 | 0.0888 | 39 | 0.869596 | 1.506951 | Resilience |
| Freezer | 24h | <i>sbell</i> | 0.99051  | 0.0768 | 39 | 0.752434 | 1.303916 | Resilience |
| Fridge  | 24h | WT           | 0.996651 | 0.0773 | 39 | 0.757098 | 1.312    | Resilience |
| Fridge  | 24h | <i>sbell</i> | 1.086795 | 0.0843 | 39 | 0.825576 | 1.430666 | Resilience |
| RT      | 24h | WT           | 0.998034 | 0.0774 | 39 | 0.758149 | 1.31382  | Resilience |
| RT      | 24h | <i>sbell</i> | 1.016732 | 0.0822 | 45 | 0.765937 | 1.349645 | Resilience |
| Freezer | 48h | WT           | 1.137755 | 0.087  | 37 | 0.866478 | 1.493963 | Resilience |
| Freezer | 48h | <i>sbell</i> | 1.021416 | 0.0792 | 39 | 0.775911 | 1.344601 | Resilience |
| Fridge  | 48h | WT           | 1.004173 | 0.0779 | 39 | 0.762812 | 1.321902 | Resilience |
| Fridge  | 48h | <i>sbell</i> | 1.041348 | 0.0808 | 39 | 0.791052 | 1.370839 | Resilience |
| RT      | 48h | WT           | 0.998964 | 0.0775 | 39 | 0.758856 | 1.315045 | Resilience |
| RT      | 48h | <i>sbell</i> | 1.027492 | 0.0831 | 45 | 0.774043 | 1.363928 | Resilience |
| Freezer | 72h | WT           | 1.005527 | 0.078  | 39 | 0.763841 | 1.323684 | Resilience |
| Freezer | 72h | <i>sbell</i> | 1.00899  | 0.0783 | 39 | 0.766471 | 1.328243 | Resilience |
| Fridge  | 72h | WT           | 0.999493 | 0.0775 | 39 | 0.759257 | 1.315741 | Resilience |
| Fridge  | 72h | <i>sbell</i> | 1.011149 | 0.0784 | 39 | 0.768111 | 1.331085 | Resilience |
| RT      | 72h | WT           | 1.002361 | 0.0777 | 39 | 0.761436 | 1.319517 | Resilience |
| RT      | 72h | <i>sbell</i> | 0.999844 | 0.0775 | 39 | 0.759524 | 1.316203 | Resilience |
| Fresh   | 0h  | WT           | 277.0349 | 26.774 | 40 | 196.8383 | 389.9055 | Gumminess  |

|         |     |              |          |        |    |          |          |             |
|---------|-----|--------------|----------|--------|----|----------|----------|-------------|
| Fresh   | 0h  | <i>sbell</i> | 320.864  | 31.01  | 40 | 227.9797 | 451.5915 | Gumminess   |
| Freezer | 24h | WT           | 474.6306 | 45.87  | 40 | 337.2337 | 668.0064 | Gumminess   |
| Freezer | 24h | <i>sbell</i> | 473.1832 | 45.73  | 40 | 336.2052 | 665.9692 | Gumminess   |
| Fridge  | 24h | WT           | 812.071  | 78.482 | 40 | 576.9911 | 1142.928 | Gumminess   |
| Fridge  | 24h | <i>sbell</i> | 670.8578 | 64.834 | 40 | 476.6566 | 944.1811 | Gumminess   |
| RT      | 24h | WT           | 610.4644 | 58.998 | 40 | 433.746  | 859.1821 | Gumminess   |
| RT      | 24h | <i>sbell</i> | 452.1936 | 43.702 | 40 | 321.2917 | 636.4279 | Gumminess   |
| Freezer | 48h | WT           | 460.4346 | 44.102 | 39 | 327.8144 | 646.7075 | Gumminess   |
| Freezer | 48h | <i>sbell</i> | 447.477  | 43.246 | 40 | 317.9405 | 629.7897 | Gumminess   |
| Fridge  | 48h | WT           | 804.2747 | 77.728 | 40 | 571.4518 | 1131.955 | Gumminess   |
| Fridge  | 48h | <i>sbell</i> | 654.5011 | 63.254 | 40 | 465.0349 | 921.1603 | Gumminess   |
| RT      | 48h | WT           | 691.7454 | 66.853 | 40 | 491.4977 | 973.5789 | Gumminess   |
| RT      | 48h | <i>sbell</i> | 485.5551 | 46.926 | 40 | 344.9957 | 683.3818 | Gumminess   |
| Freezer | 72h | WT           | 590.1039 | 57.03  | 40 | 419.2795 | 830.5262 | Gumminess   |
| Freezer | 72h | <i>sbell</i> | 498.8946 | 48.215 | 40 | 354.4737 | 702.1561 | Gumminess   |
| Fridge  | 72h | WT           | 1088.795 | 105.23 | 40 | 773.6088 | 1532.396 | Gumminess   |
| Fridge  | 72h | <i>sbell</i> | 627.5834 | 60.652 | 40 | 445.9094 | 883.2757 | Gumminess   |
| RT      | 72h | WT           | 886.9733 | 85.721 | 40 | 630.2106 | 1248.347 | Gumminess   |
| RT      | 72h | <i>sbell</i> | 594.0192 | 57.408 | 40 | 422.0614 | 836.0366 | Gumminess   |
| Fresh   | 0h  | WT           | 2.90255  | 0.2297 | 42 | 2.195948 | 3.836519 | Springiness |
| Fresh   | 0h  | <i>sbell</i> | 1.397544 | 0.1155 | 50 | 1.048093 | 1.863508 | Springiness |
| Freezer | 24h | WT           | 1.144744 | 0.0888 | 39 | 0.869596 | 1.506951 | Springiness |
| Freezer | 24h | <i>sbell</i> | 0.99051  | 0.0768 | 39 | 0.752434 | 1.303916 | Springiness |
| Fridge  | 24h | WT           | 0.996651 | 0.0773 | 39 | 0.757098 | 1.312    | Springiness |
| Fridge  | 24h | <i>sbell</i> | 1.086795 | 0.0843 | 39 | 0.825576 | 1.430666 | Springiness |
| RT      | 24h | WT           | 0.998034 | 0.0774 | 39 | 0.758149 | 1.31382  | Springiness |
| RT      | 24h | <i>sbell</i> | 1.016732 | 0.0822 | 45 | 0.765937 | 1.349645 | Springiness |
| Freezer | 48h | WT           | 1.137755 | 0.087  | 37 | 0.866478 | 1.493963 | Springiness |
| Freezer | 48h | <i>sbell</i> | 1.021416 | 0.0792 | 39 | 0.775911 | 1.344601 | Springiness |
| Fridge  | 48h | WT           | 1.004173 | 0.0779 | 39 | 0.762812 | 1.321902 | Springiness |
| Fridge  | 48h | <i>sbell</i> | 1.041348 | 0.0808 | 39 | 0.791052 | 1.370839 | Springiness |

|         |     |              |          |        |    |          |          |             |
|---------|-----|--------------|----------|--------|----|----------|----------|-------------|
| RT      | 48h | WT           | 0.998964 | 0.0775 | 39 | 0.758856 | 1.315045 | Springiness |
| RT      | 48h | <i>sbell</i> | 1.027492 | 0.0831 | 45 | 0.774043 | 1.363928 | Springiness |
| Freezer | 72h | WT           | 1.005527 | 0.078  | 39 | 0.763841 | 1.323684 | Springiness |
| Freezer | 72h | <i>sbell</i> | 1.00899  | 0.0783 | 39 | 0.766471 | 1.328243 | Springiness |
| Fridge  | 72h | WT           | 0.999493 | 0.0775 | 39 | 0.759257 | 1.315741 | Springiness |
| Fridge  | 72h | <i>sbell</i> | 1.011149 | 0.0784 | 39 | 0.768111 | 1.331085 | Springiness |
| RT      | 72h | WT           | 1.002361 | 0.0777 | 39 | 0.761436 | 1.319517 | Springiness |
| RT      | 72h | <i>sbell</i> | 0.999844 | 0.0775 | 39 | 0.759524 | 1.316203 | Springiness |

Table 4. Proportion of chain length distribution per DP fraction. Data is reported as Mean  $\pm$  SD of  $n = 3$ ,  $p$ -value obtained from independent samples  $t$ -test between *sbell* and WT control starch

| Genotype    | WT             | <i>sbell</i>   | $p$ -value |
|-------------|----------------|----------------|------------|
| 0-12 DP     | 25.1 $\pm$ 2.7 | 14.1 $\pm$ 2.2 | 0.005      |
| 12-25 DP    | 27.3 $\pm$ 1.5 | 17.5 $\pm$ 1.9 | 0.002      |
| 25-37 DP    | 10.8 $\pm$ 0.3 | 9.6 $\pm$ 0.9  | 0.13       |
| 37-100 DP   | 10.9 $\pm$ 0.7 | 19.0 $\pm$ 0.3 | 0.0006     |
| 100-1600 DP | 15.8 $\pm$ 2.7 | 26.3 $\pm$ 3.4 | 0.01       |
| >1600 DP    | 10.1 $\pm$ 1.2 | 13.5 $\pm$ 1.7 | 0.05       |





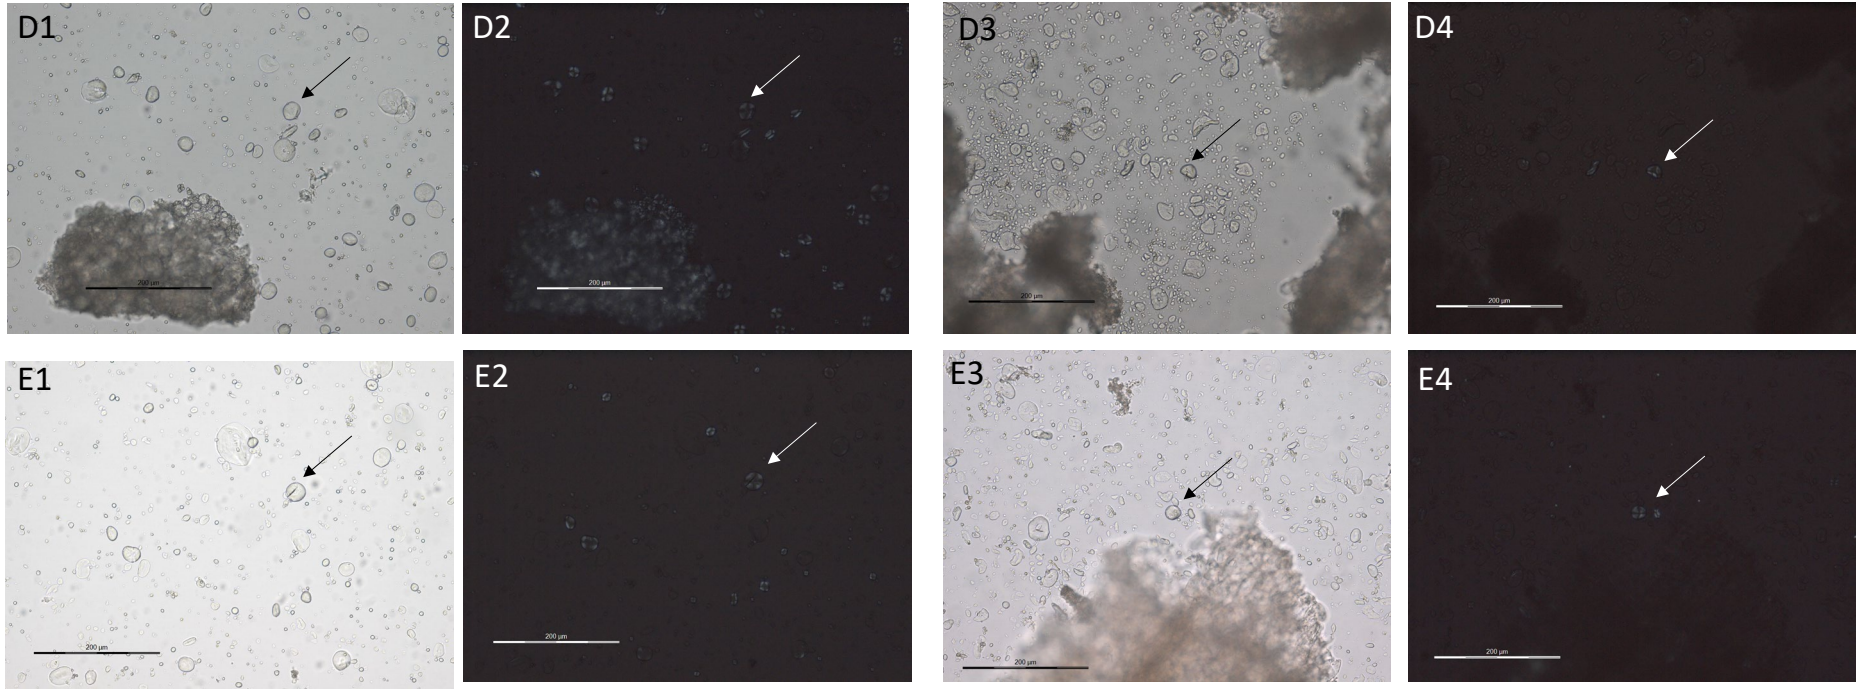

*Figure 2 Micrographs of starch in water using brightfield (BF) and polarised light filter (P) highlighting birefringence of starch granules. 1. WT control starch under BF; 2. WT control starch under P; 3. sbell mutant starch under BF; 4. sbell mutant starch under P; D. Starch from fresh bread crust; E: Starch from frozen crust after 7 days of freezer storage.*
